# Supplementary material
Source: publisher figshare collection journal article supplement (https://acs.figshare.com/ndownloader/files/4625140)
Supplement: Supplementary file 1 [file 4625140]

SUPPORTING INFORMATION

# Hydrogen-Free Homogeneous Catalytic Reduction of Olefins in Aqueous Solutions

*Carina Gaviglio and Fabio Doctorovich\**

Departamento de Química Inorgánica, Analítica y Química Física/INQUIMAE-CONICET,  
Facultad de Ciencias Exactas y Naturales, Universidad de Buenos Aires, Ciudad Universitaria,  
Pabellón II, Piso 3, (C1428EHA) Buenos Aires, Argentina

## Table of Contents

|                                                                     |     |
|---------------------------------------------------------------------|-----|
| 1. General Considerations.....                                      | S2  |
| 2. Reactions Conditions for Table 3.....                            | S3  |
| 3. Selected NMR Spectra.....                                        | S4  |
| 4. Selected Mass Spectrum.....                                      | S10 |
| 5. Kinetic Studies of the Catalytic Reduction of Cinnamic Acid..... | S11 |
| 6. Kinetic Isotope Effect on the Catalytic Reduction.....           | S13 |

## 1. General Considerations

Unless otherwise noted, all manipulations were carried out with exclusion of oxygen using standard Schlenk techniques or septa; N<sub>2</sub> or Ar were used as inert gasses. All solvents were reagent grade or better. All non-deuterated solvents were distilled under a nitrogen atmosphere. Deuterated solvents were used as received. Water used in all reactions was MilliQ obtained from deionized water. Commercially available reagents were used as received. <sup>1</sup>H NMR spectra were recorded at 200 or 500 MHz spectrometers. <sup>1</sup>H NMR chemical shifts are reported in parts per million downfield from tetramethylsilane. <sup>1</sup>H NMR chemical shifts were referenced to the residual hydrogen signal of the deuterated solvents (7.26 ppm, CHCl<sub>3</sub>; 1.94 ppm, CH<sub>3</sub>CN; 3.53 ppm, Dioxane).

Compound **1** described in the literature was characterized by comparing its UV-Vis spectra to the previously reported data. Reported yields in the publication are indicated whether they are isolated, spectroscopically or chromatographically determined. They represent an average of at least two independent runs. For known compounds prepared using the new method described, a copy of the <sup>1</sup>H NMR spectrum of representative examples is included.

## 2. Reaction Conditions for Table 3

**TABLE S1. Reaction Conditions for Table 3**

| Entry | Substrate<br>(mmol) | <b>2</b><br>(mmol) | NH <sub>2</sub> OH<br>(mmol) | T<br>(°C) | Yield <sup>a</sup><br>(%)                        | Medium                                                                         |
|-------|---------------------|--------------------|------------------------------|-----------|--------------------------------------------------|--------------------------------------------------------------------------------|
| 1     | <b>3</b> ; 0.25     | 0.02               | 2.5                          | 100       | 95                                               | aqueous borax buffer                                                           |
| 1     | <b>3</b> ; 0.25     | 0.02               | 5                            | 100       | 96 <sup>b</sup>                                  | aqueous borax buffer                                                           |
| 2     | <b>5</b> ; 0.25     | 0.025              | 2.5                          | 60        | 42                                               | aqueous borax buffer:ethanol=1:1                                               |
| 3     | <b>6</b> ; 0.25     | 0.025              | 2.5                          | 90        | 44                                               | aqueous borax buffer:ethanol=1:1                                               |
| 3     | <b>6</b> ; 0.25     | 0.02               | 12.5                         | 90        | 93 <sup>b</sup>                                  | aqueous borax buffer:ethanol=1:1                                               |
| 4     | <b>8</b> ; 0.25     | 0.025              | 2.5                          | 100       | 94                                               | aqueous borax buffer                                                           |
| 5     | <b>10</b> ; 0.25    | 0.025              | 2.5                          | 100       | <b>11</b> (19); <b>12</b> (36)                   | aqueous borax buffer                                                           |
| 6     | <b>13</b> ; 0.25    | 0.02               | 2.5                          | 100       | 36                                               | aqueous borax buffer                                                           |
| 7     | <b>15</b> ; 0.25    | 0.02               | 2.5                          | 100       | 7                                                | aqueous borax buffer                                                           |
| 8     | <b>17</b> ; 0.25    | 0.025              | 2.5                          | 70        | 38 <sup>c</sup>                                  | aqueous borax buffer:ethanol=1:1                                               |
| 9     | <b>19</b> ; 0.25    | 0.025              | 2.5                          | 100       | <b>20</b> (29); <b>21</b> (3);<br><b>22</b> (40) | aqueous borax buffer:ethanol=1:1                                               |
| 10    | <b>23</b> ; 0.25    | 0.02               | 2.5                          | 80        | 86                                               | phosphate buffer in D <sub>2</sub> O:<br><i>p</i> -dioxane-d <sub>8</sub> =1:1 |
| 11    | <b>25</b> ; 0.25    | 0.02               | 2.5                          | 80        | 55                                               | phosphate buffer in D <sub>2</sub> O:<br><i>p</i> -dioxane-d <sub>8</sub> =1:1 |
| 12    | <b>27</b> ; 0.25    | 0.02               | 2.5                          | 80        | 21                                               | phosphate buffer in D <sub>2</sub> O:<br><i>p</i> -dioxane-d <sub>8</sub> =1:1 |

13    **29**; 0.25    0.025    2.5    60    8    phosphate buffer in D<sub>2</sub>O:*p*-  
dioxane-d<sub>8</sub>=1:1

---

<sup>a</sup> Relative yields determined by <sup>1</sup>H NMR analysis of crude reaction mixtures (except where noted). <sup>b</sup> Isolated yield. <sup>c</sup> Yield determined by gas chromatography with an internal standard.

### 3. Selected NMR Spectra

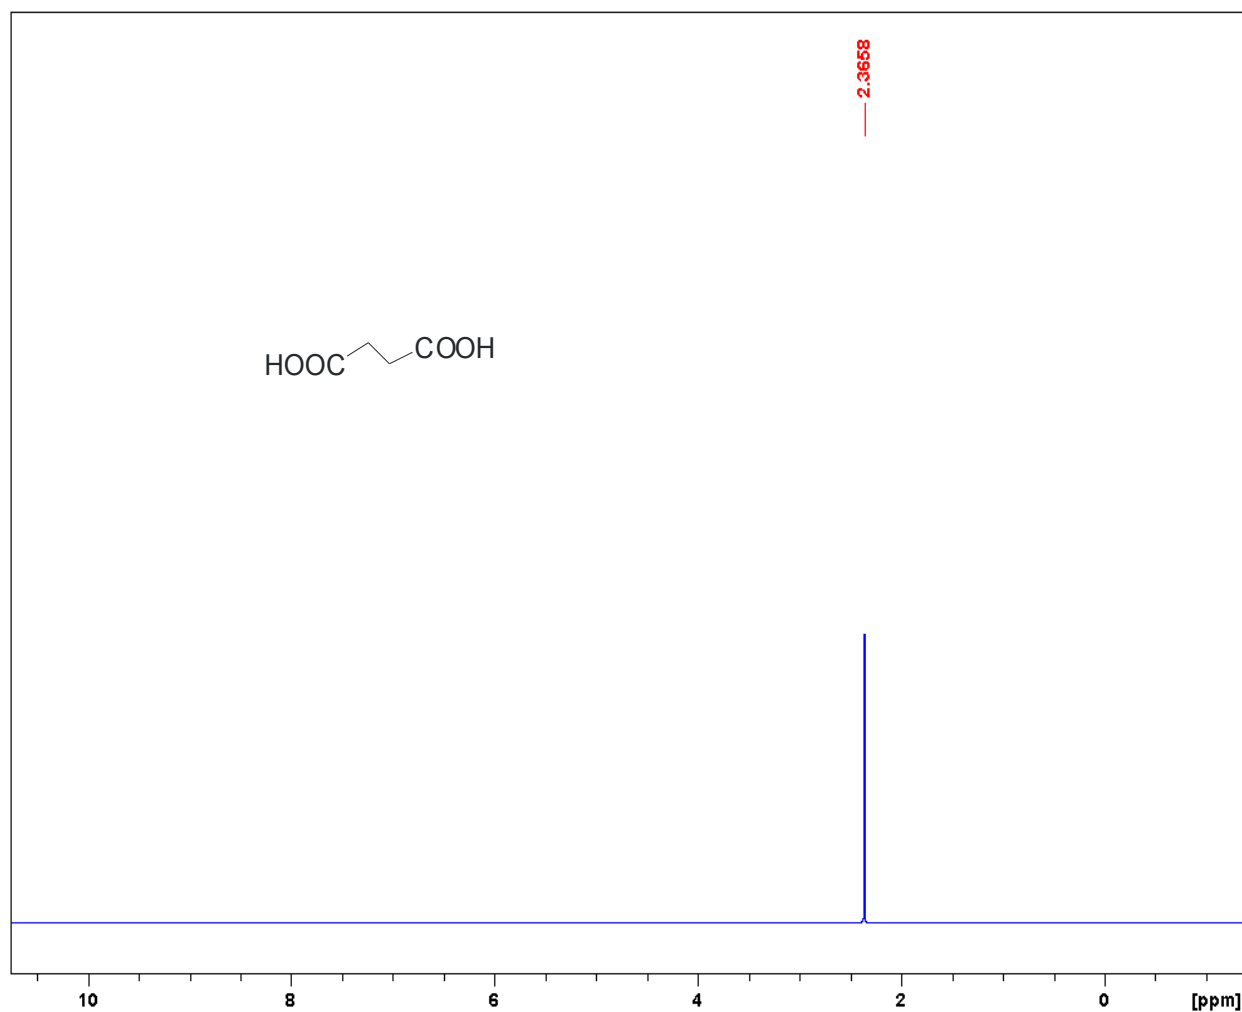

**FIGURE S1.** <sup>1</sup>H NMR (500 MHz) spectrum of **4**.

**Characterization of 4:** <sup>1</sup>H NMR (D<sub>2</sub>O): 2.37 (s, 4H, 2 CH<sub>2</sub>).

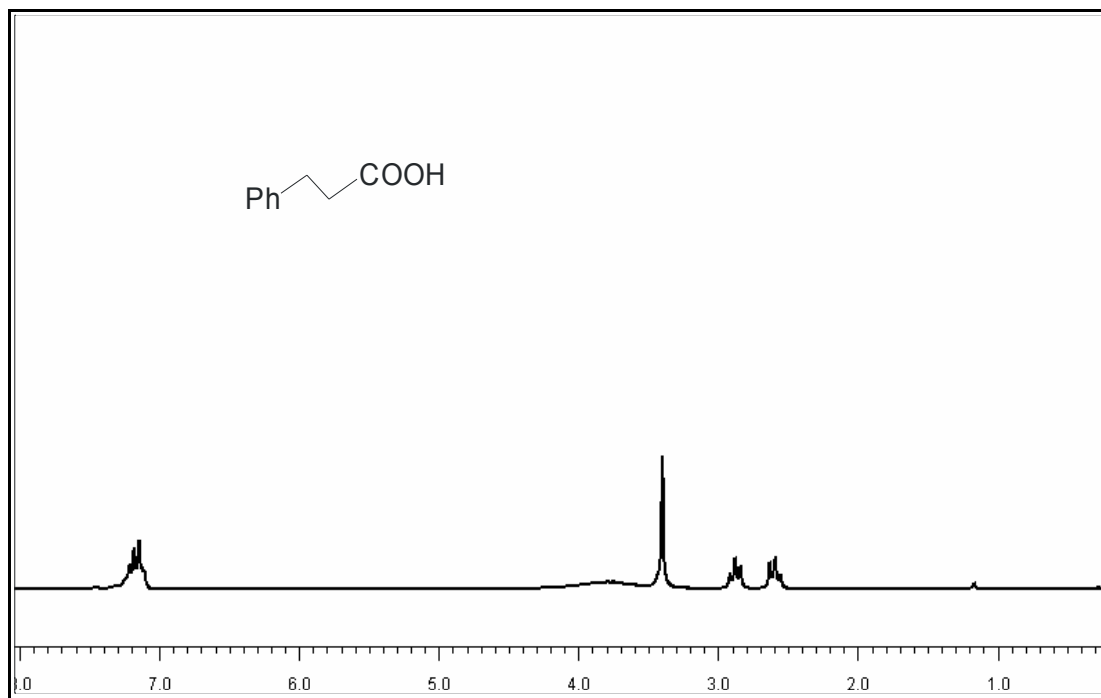

**FIGURE S2.**  $^1\text{H}$  NMR (200 MHz) spectrum of **7**.

**Characterization of 7:**  $^1\text{H}$  NMR ( $\text{CDCl}_3$ ): 7.23-7.06 (m, 5H, Ar), 2.87 (t,  $J = 7.6$  Hz, 2H,  $\text{CH}_2$ ), 2.58 (t,  $J = 7.6$  Hz, 2H,  $\text{CH}_2$ ). Internal standard:  $\text{CH}_3\text{OH}$ , 3.40 (s, 3H,  $\text{CH}_3$ ).

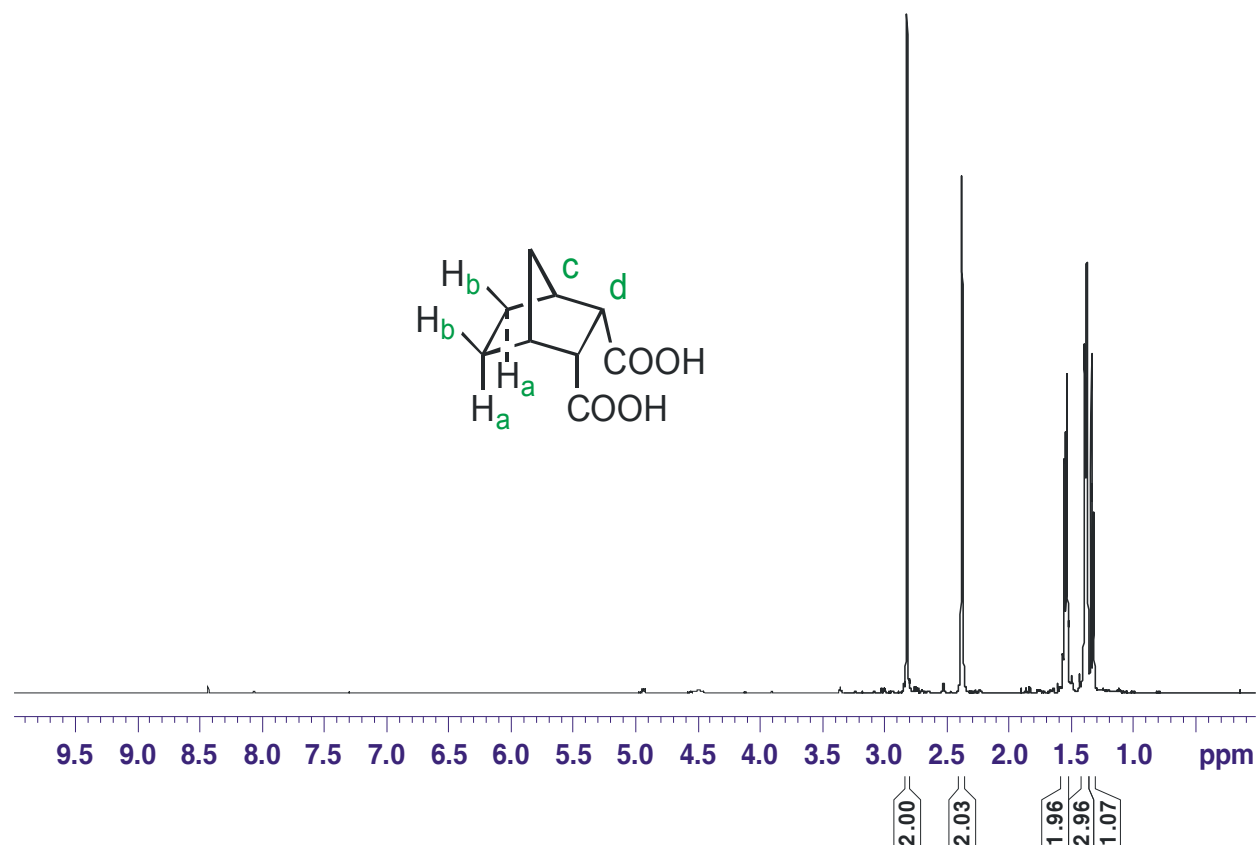

**FIGURE S3.**  $^1\text{H}$  NMR (500 MHz) spectrum of **9** (crude reaction mixture).

**Characterization of 9:**  $^1\text{H}$  NMR ( $\text{D}_2\text{O}$ ): 2.82 (s, 2H,  $\text{H}_d$ ), 2.39 (s, 2H,  $\text{H}_c$ ), 1.55 (dd,  $J = 7.7$  Hz,  $J = 2.0$  Hz, 2H,  $\text{H}_a$ ), 1.39 (br d,  $J = 8.1$  Hz, 3H, 2  $\text{H}_b$  and 1 H from  $\text{CH}_2$ ), 1.36 (dt,  $J = 9.5$  Hz,  $J = 1.7$  Hz, 1H,  $\text{CH}_2$ ).

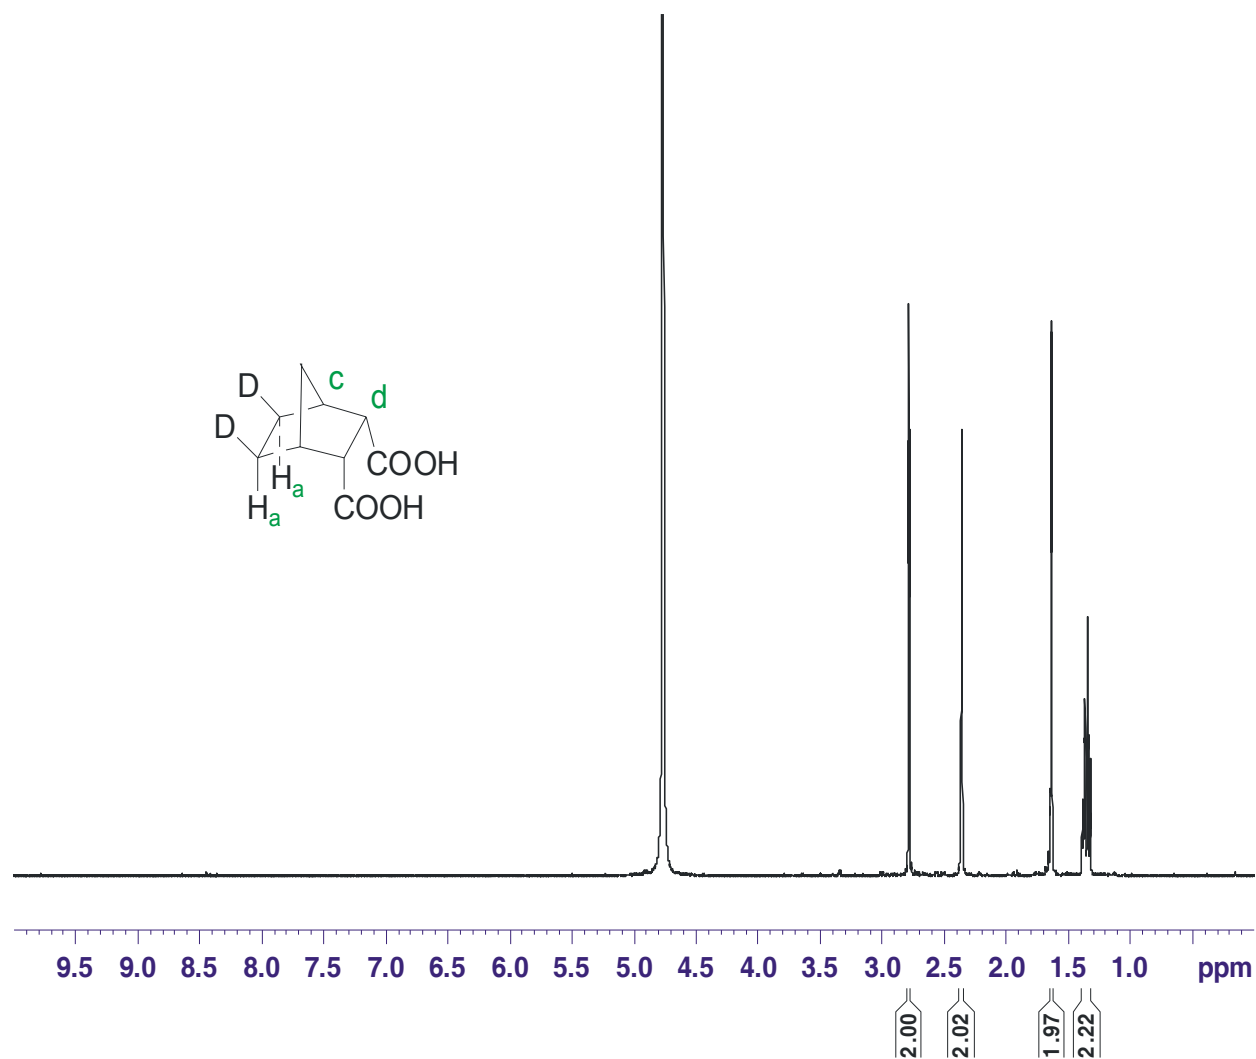

**FIGURE S4.**  $^1\text{H}$  NMR (500 MHz) spectrum for the reduction of the norbornene derivative **8** carried out in  $\text{D}_2\text{O}$  (crude reaction mixture).

**Characterization:**  $^1\text{H}$  NMR ( $\text{D}_2\text{O}$ ): 2.79 (t,  $J = 2.3$  Hz, 2H,  $\mathbf{H}_d$ ), 2.36 (m, 2H,  $\mathbf{H}_c$ ), 1.64 (d,  $J = 2.2$ , 2H,  $\mathbf{H}_a$ ), 1.35 (ddt,  $J = 13.4$ ,  $J = 9.2$ ,  $J = 1.6$ , 2H,  $\mathbf{CH}_2$ ).

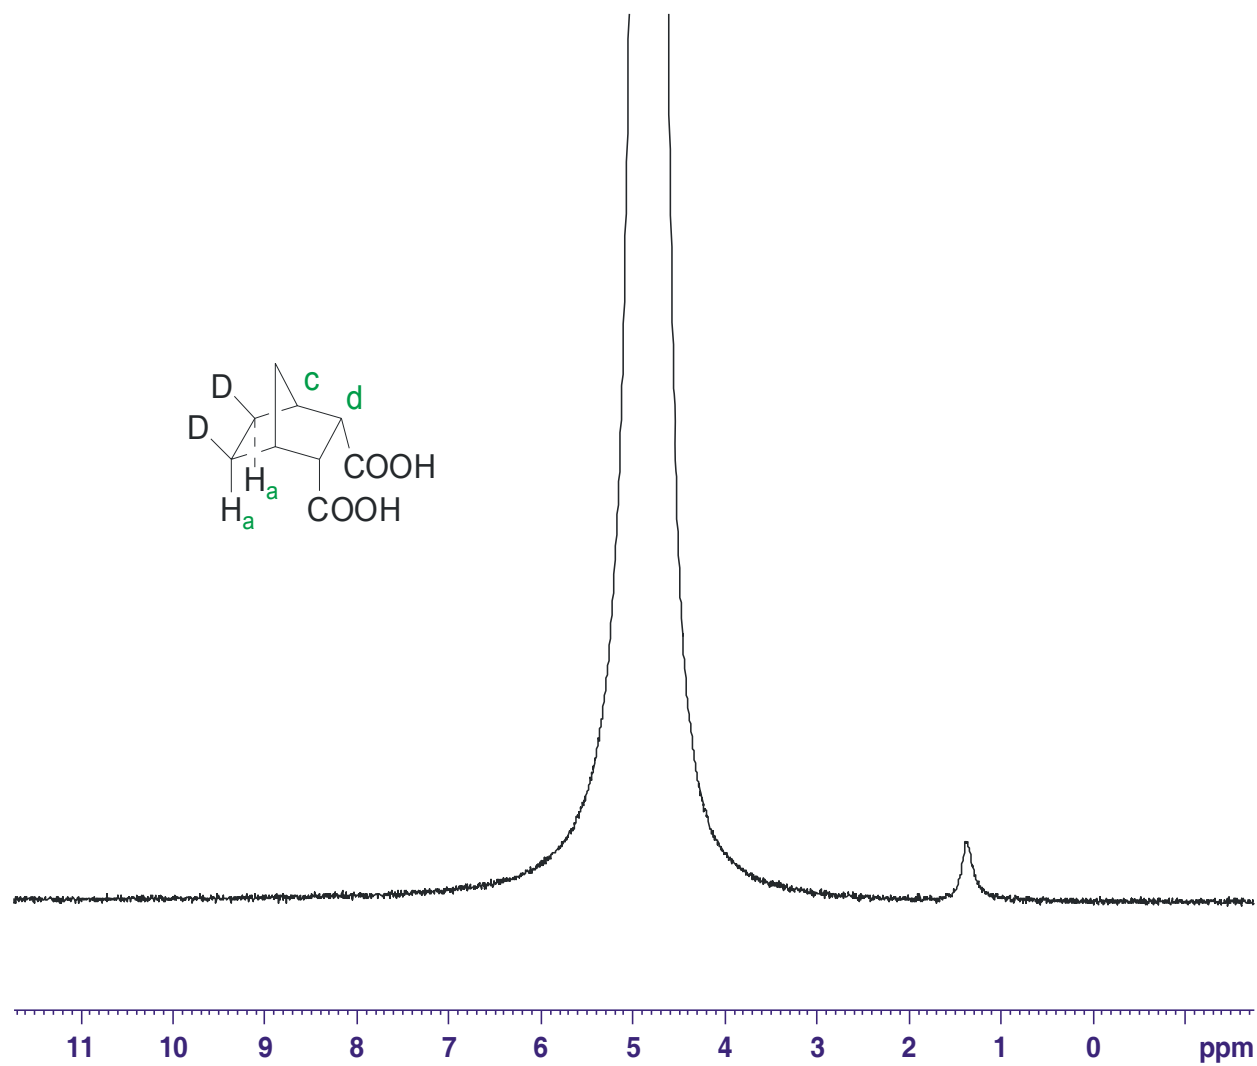

**FIGURE S5.**  $^2\text{D}$  NMR (500 MHz) spectrum for the reduction of the norbornene derivative **8** carried out in  $\text{D}_2\text{O}$  (crude reaction mixture).

**Characterization:**  $^2\text{D}$  NMR ( $\text{D}_2\text{O}$ ): 1.37 (br s, 2D)

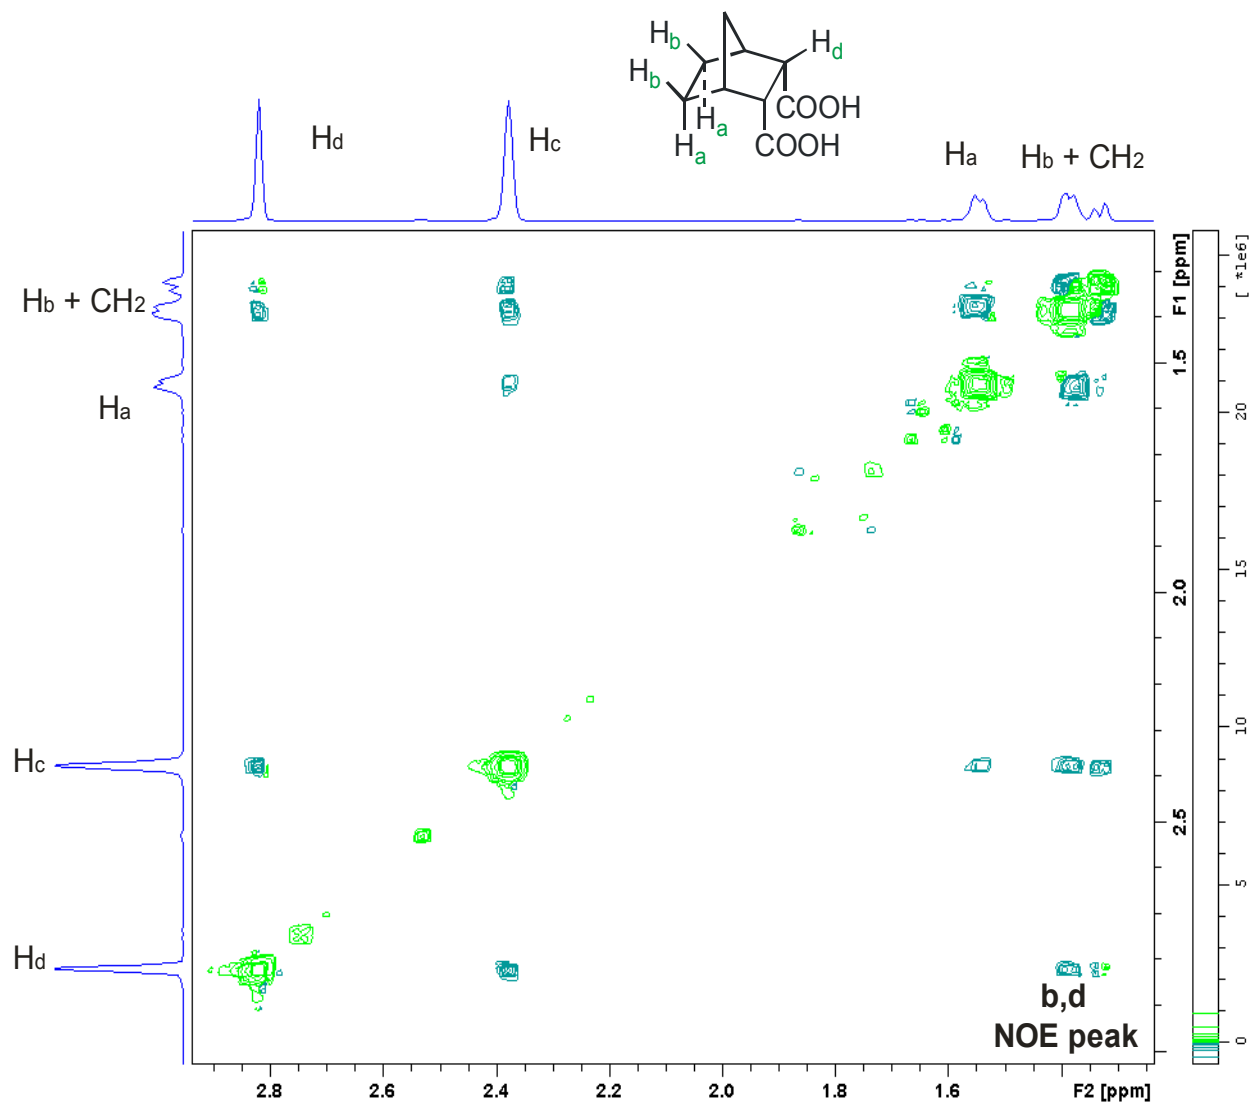

**FIGURE S6.** 2D Noesy (500 MHz) spectrum of **9** (crude reaction mixture).

#### 4. Selected Mass Spectrum

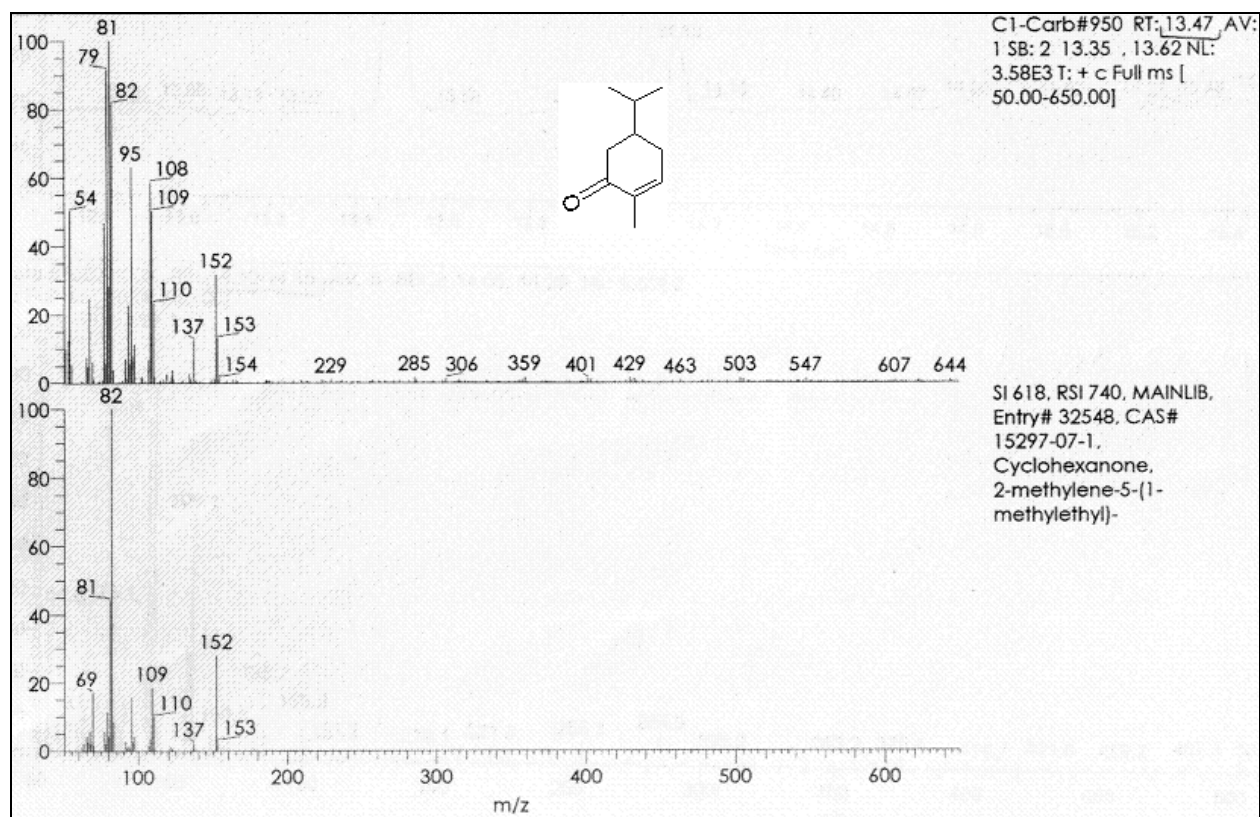

**FIGURE S7.** Mass spectrum of **16**.

## 5. Kinetic Studies of the Catalytic Reduction of Cinnamic Acid

*Reduction of Cinnamic Acid by  $Na_3[Fe(CN)_5N_2H_2]$ :*

[CA]: cinnamic acid concentration

$[Fe^{II}(CN)_5N_2H_2]^{3-}$ : coordinated diazene concentration

Working at high  $[Fe^{II}(CN)_5N_2H_2]^{3-}$  with respect to [CA] we can assume that during the reaction  $[Fe^{II}(CN)_5N_2H_2]^{3-}$  remains constant. This last observation was confirmed by following the 440 nm band due to  $[Fe^{II}(CN)_5N_2H_2]^{3-}$  throughout the experiments.

$$\nu_{obs} = k_{obs} [CA]^n \quad (n = 1)$$

Where the sub index *obs* refers to the observed kinetics parameters.

Rate measurements involving cinnamic acid were done in spectrophotometric cells at 30°C, measuring the disappearance of the absorption at 268 nm ( $\epsilon_{268nm} = 18579 \pm 699 \text{ M}^{-1} \text{ cm}^{-1}$ ). The observed rate constants ( $k_{obs}$ ) for the spontaneous decay process due to the reduction of cinnamic acid by  $[Fe^{II}(CN)_5N_2H_2]^{3-}$  were determined by initial rates showing that all kinetics were pseudo-first-order with respect to cinnamic acid concentration with an observed rate constant  $k_{obs} = 2.4 \cdot 10^{-5} \pm 1.7 \cdot 10^{-6} \text{ s}^{-1}$  at 30°C. These reactions were carried out in borax aqueous buffered solutions.

The data were collected directly from the spectrophotometer to a PC and commercial software was used to obtain values of the first order rate constants. Values of k were reproducible.

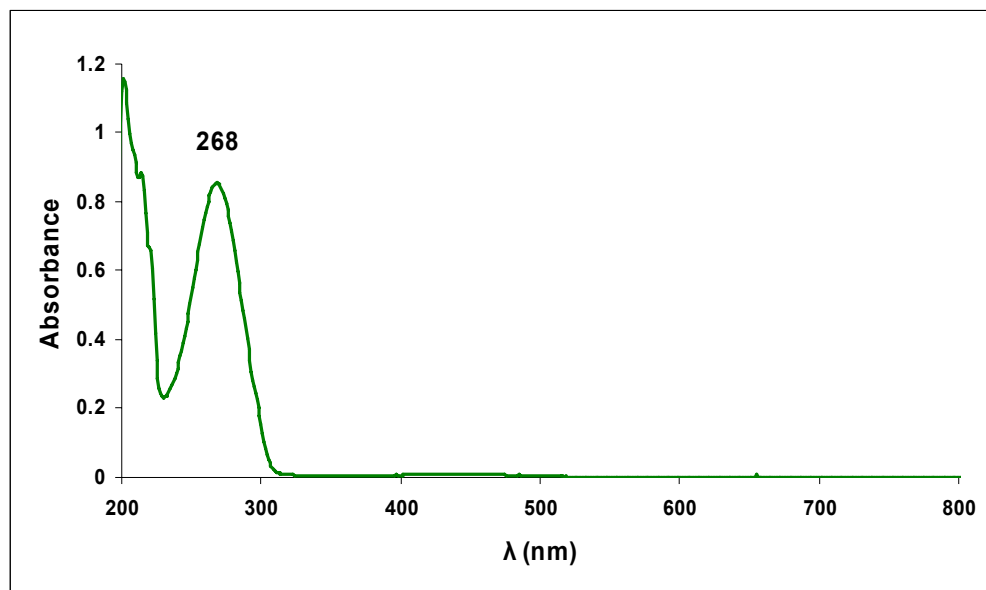

**FIGURE S8.** UV – visible spectrum of **6** ( $\lambda_{\text{max}} = 268 \text{ nm}$ ) in borax aqueous buffer.

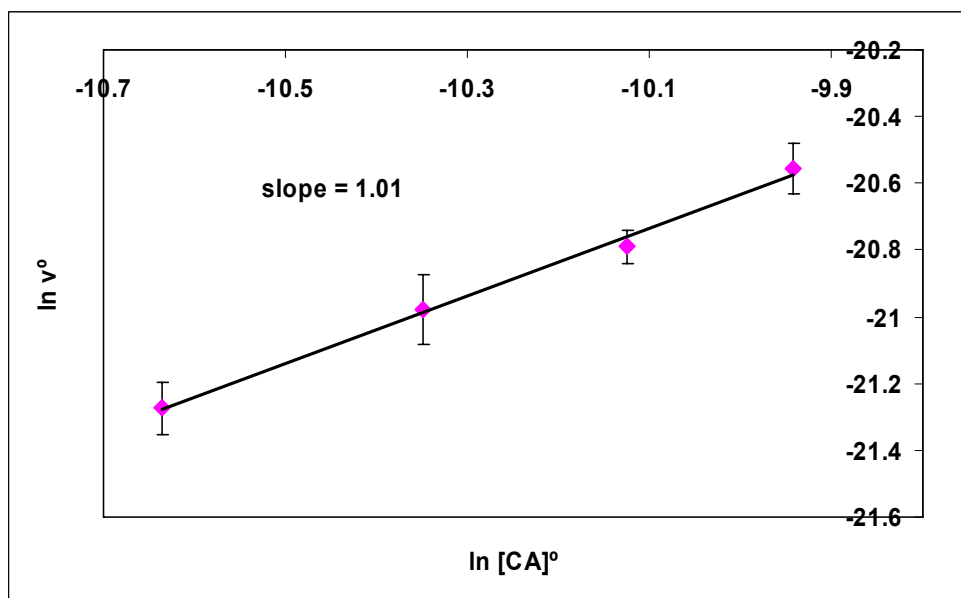

**FIGURE S9.** Dependence of  $\ln \nu^\circ$  vs  $\ln [\text{AC}]^\circ$  for different cinnamic acid concentrations.

## 6. Kinetic Isotope Effect on the Catalytic Reduction

**TABLE S2. Kinetic Isotope Effect on the Catalytic Reduction of Maleic Acid<sup>a</sup>**

| Entry | 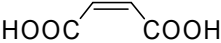 | <b>2</b> | NH <sub>2</sub> OH | Solven           | T    |  |
|-------|-----------------------------------------------------------------------------------|----------|--------------------|------------------|------|-------------------------------------------------------------------------------------|
|       | <b>3</b> (mmol)                                                                   | (mmol)   | (mmol)             | t                | (°C) | <b>4</b> (yield [%]) <sup>b</sup>                                                   |
| 1     | 0.25                                                                              | 0.02     | 2.5                | H <sub>2</sub> O | 25   | 67                                                                                  |
| 2     | 0.25                                                                              | 0.02     | 2.5                | D <sub>2</sub> O | 25   | 65                                                                                  |

<sup>a</sup> All reactions were run in aqueous borax buffer (3 ml). <sup>b</sup> Relative yield determined by <sup>1</sup>H NMR analysis of crude reaction mixtures.
